# Supplementary material for: Novel butterfly pyrene-based organic semiconductors for field effect transistors
Source: Royal Society of Chemistry journal article supplement (doi:10.1039/b515433b), 2006-01-01
Supplement: b515433b.pdf [file b515433b.pdf]

## Novel butterfly pyrene based organic semiconductors for field effect transistors

Hengjun Zhang,<sup>a</sup> Ying Wang,<sup>a</sup> Kuizhan Shao,<sup>b</sup> Yunqi Liu,<sup>\*a</sup> Shiyan Chen,<sup>a</sup> Wenfeng Qiu,<sup>a</sup> Xiaobo Sun,<sup>a</sup> Ting Qi,<sup>a</sup> Yongqiang Ma,<sup>a</sup> Gui Yu,<sup>a</sup> Zhongmin Su<sup>\*b</sup> and Daoben Zhu<sup>\*a</sup>

<sup>a</sup> Key Laboratory of Organic Solids, Institute of Chemistry, Chinese Academy of Sciences, Beijing 100080, People's Republic of China

<sup>b</sup>Institute of Functional Material Chemistry, Faculty of Chemistry, Northeast Normal University, Changchun 130024, People's Republic of China

### Materials.

All reagents were purchased from Aldrich and used as received.

### Instrumentation.

<sup>1</sup>H NMR spectra were obtained on a Bruker DMX 400 NMR Spectrometer. The signals have been designated as follows: s (singlet), d (doublet), t (triplet), dd (doublet of doublets), and m (multiplet).

<sup>1</sup>H chemical shifts are reported in ppm downfield from tetramethylsilane (TMS) reference using the residual protonated solvent resonance as an internal standard. MS spectra (MALDI-TOF-MS) were determined on a Bruker BIFLEX III Mass Spectrometer. Elemental analyses were carried out on a Carlo-Erba 1160 elemental analyzer. Differential scanning calorimetry measurements was done on DSC instruments Q100 DSC with a heating rate of 10 °C/min under flowing N<sub>2</sub> from room temperature to 400 °C. Thermogravimetric analysis of the molecules was conducted on a TA Instruments SDT2960 TGA. A heating rate of 10 °C/min under flowing N<sub>2</sub> was used with runs being conducted from room temperature to 600 °C. Cyclic voltammetric measurements were carried out in a conventional three-electrode cell using Pt button working electrodes of 2 mm diameter, a platinum wire counter electrode, and a Ag/AgCl reference electrode on a computer-controlled EG&G Potentiostat/Galvanostat model 283 at room temperature.

**Synthetic Details.**

**1, 3, 6, 8-Tetrakis (4-trifluoromethylphenyl)pyrene (1).** A mixture of 4-trifluoromethylphenylboronic acid (1.14 g, 6 mmol, 6 equiv), 1, 3, 6, 8-tetrabromopyrene (0.5 g, 1 mmol), palladium tetrakis(triphenylphosphine) (0.02 g, 1.6% mol), and potassium carbonate (1.2 g, 8 mmol) in dry dioxane (15 mL) was stirred under nitrogen for 24 h at 85 °C. The resulting mixture was cooled and poured into a solution of ice with concentrated hydrochloric acid (3:1) and the organic phase was extracted twice with dichloromethane, dried over magnesium sulfate. After evaporation of the solvent, the product was recrystallized from ethyl acetate /ethanol to give 0.58 g (75%) of **1** as a light green solid. Data for **1**: <sup>1</sup>H NMR (C<sub>6</sub>D<sub>6</sub>, 300 MHz): δ = 8.05 (s, 4H, pyrene-H), 7.82 (s, 2H, pyrene-H), 7.65 (d, *J* = 8.0 Hz, 8H, phenyl), 7.45 (d, *J* = 8.0 Hz, 8H, phenyl); MS (MALDI-TOF): *m/z* (M<sup>+</sup>) 778; Elemental analysis (%): calcd. for C<sub>44</sub>H<sub>22</sub>F<sub>12</sub>, C 67.87, H 2.85; found: C 67.81, H 2.94.

**1, 3, 6, 8-Tetrakis (2-thiophene) pyrene (2).** A mixture of 2-thiopheneboronic acid (1.54 g, 12.0 mmol, 6 equiv), 1, 3, 6, 8-tetrabromopyrene (1.04 g, 2 mmol), palladium tetrakis(triphenylphosphine) (0.04 g, 1.6% mol), and potassium carbonate (2.4 g, 16 mmol) in dry dioxane (20 mL) was stirred under nitrogen for 24 h at 85 °C. The resulting mixture was cooled and poured into a solution of ice with concentrated hydrochloric acid (3:1) and the organic phase was extracted twice with dichloromethane, dried over magnesium sulfate. After evaporation of the solvent, the product was recrystallized from dichloromethane/ethanol to give 0.82 g (77%) of **2** as a light yellow solid. Data for **2**: <sup>1</sup>H NMR (CDCl<sub>3</sub>, 400 MHz): δ = 8.52 (s, 4H, pyrene-H), 8.24 (s, 2H, pyrene-H), 7.53 (d, *J* = 5.1 Hz, 4H, thiophene), 7.41 (d, *J* = 3.5 Hz, 4H, thiophene), 7.24–7.27 (m, 4H, thiophene); MS (MALDI-TOF): *m/z* (M<sup>+</sup>) 530.2; Elemental analysis (%): calcd. for C<sub>32</sub>H<sub>18</sub>S<sub>4</sub>, C 72.42, H 3.42; found: C 72.30, H 3.44.

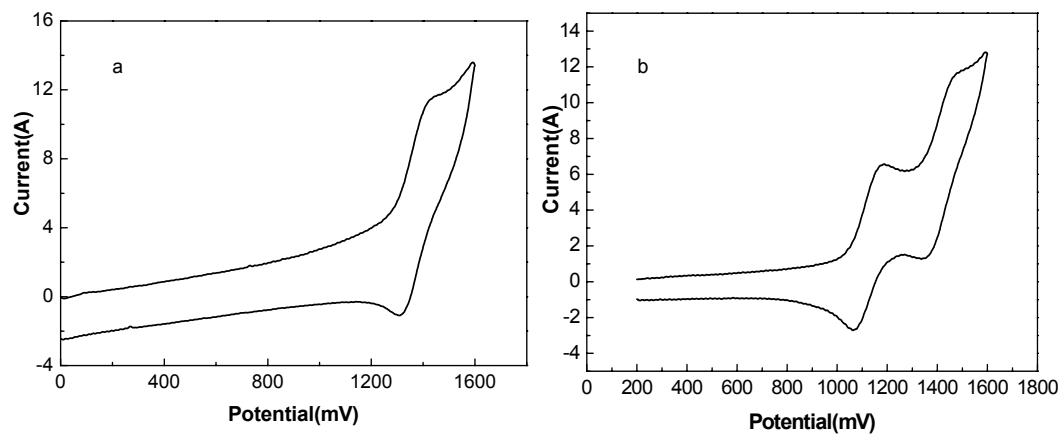

Fig. S1 Cyclic voltammograms of **1** (a) and **2** (b). Conditions: 0.1 M  $(n\text{-Bu})_4\text{NPF}_6$  in dichloromethane; working electrode, Pt disk (2 mm diameter); counter electrode, Pt wire; reference electrode, Ag/AgCl.

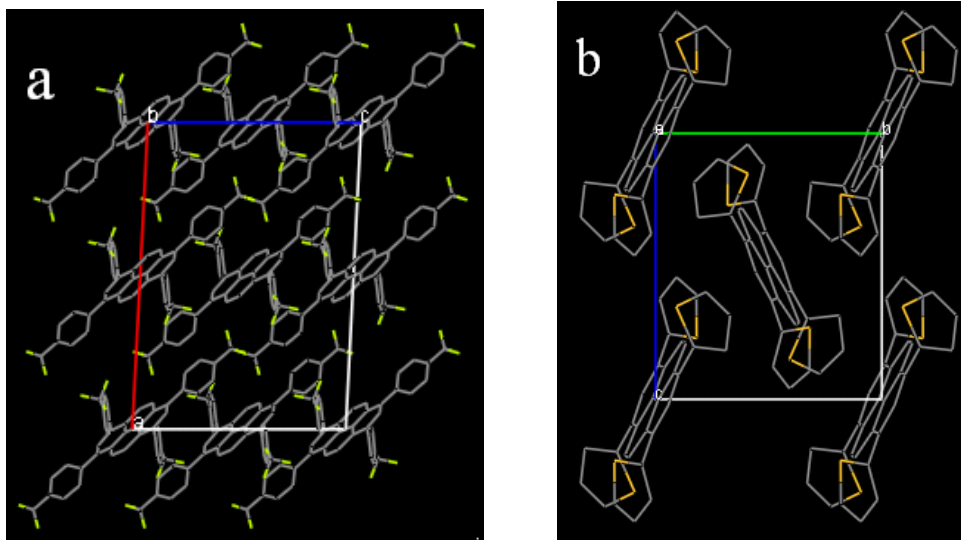

Fig. S2 a) Crystal packing view of **1** along b-axis. b) Crystal packing view of **2** along a-axis.
